# Supplementary material for: Prognostic Markers in Tyrosine Kinases Specific to Basal-like 2 Subtype of Triple-Negative Breast Cancer
Source: MDPI journal article supplement (doi:10.3390/ijms25031405), 2024-01-24
Supplement: s1 [file s1]

## Supplementary Material

# Prognostic Markers in Tyrosine Kinases Specific to Basal-Like 2 Subtype of Triple-Negative Breast Cancer

Praopim Limsakul <sup>1,2</sup>, Pongsakorn Choochuen <sup>3</sup>, Thawirasm Jungrungrueang <sup>3</sup> and Krit Charupanit <sup>3,\*</sup>

<sup>1</sup> Division of Physical Science, Faculty of Science, Prince of Songkla University, Songkhla 90110, Thailand; praopim.l@psu.ac.th

<sup>2</sup> Center of Excellence for Trace Analysis and Biosensor (TAB-CoE), Faculty of Science, Prince of Songkla University, Songkhla 90110, Thailand

<sup>3</sup> Department of Biomedical Sciences and Biomedical Engineering, Faculty of Medicine, Prince of Songkla University, Songkhla 90110, Thailand; pongsakorn.mwit20@gmail.com (P.C.); thawirasm.j@psu.ac.th (T.J.)

\* Correspondence: krit.ch@psu.ac.th

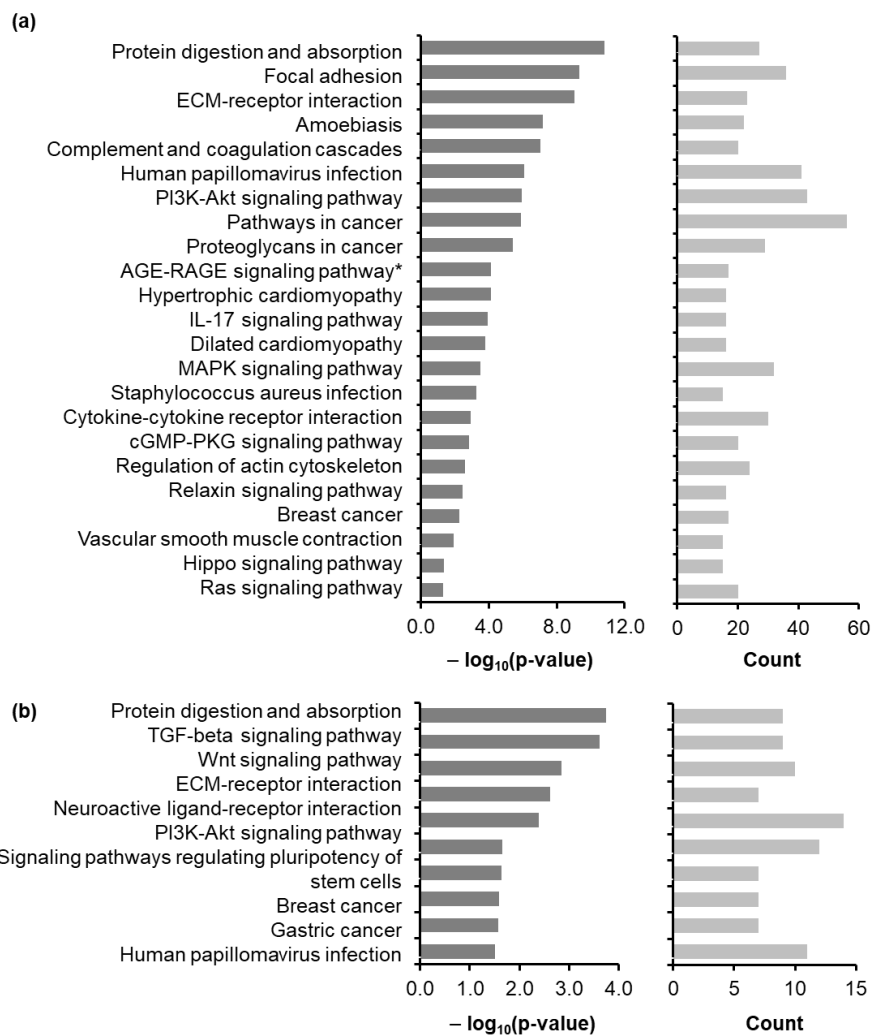

**Figure S1. KEGG pathway enrichment analysis for differentially expressed genes in the BL2 subtype.**

KEGG analysis for (a) upregulated and (b) downregulated DE genes. The enriched pathways were displayed as a  $-\log_{10}(p\text{-value})$ , with a count representing the number of genes in the pathway.

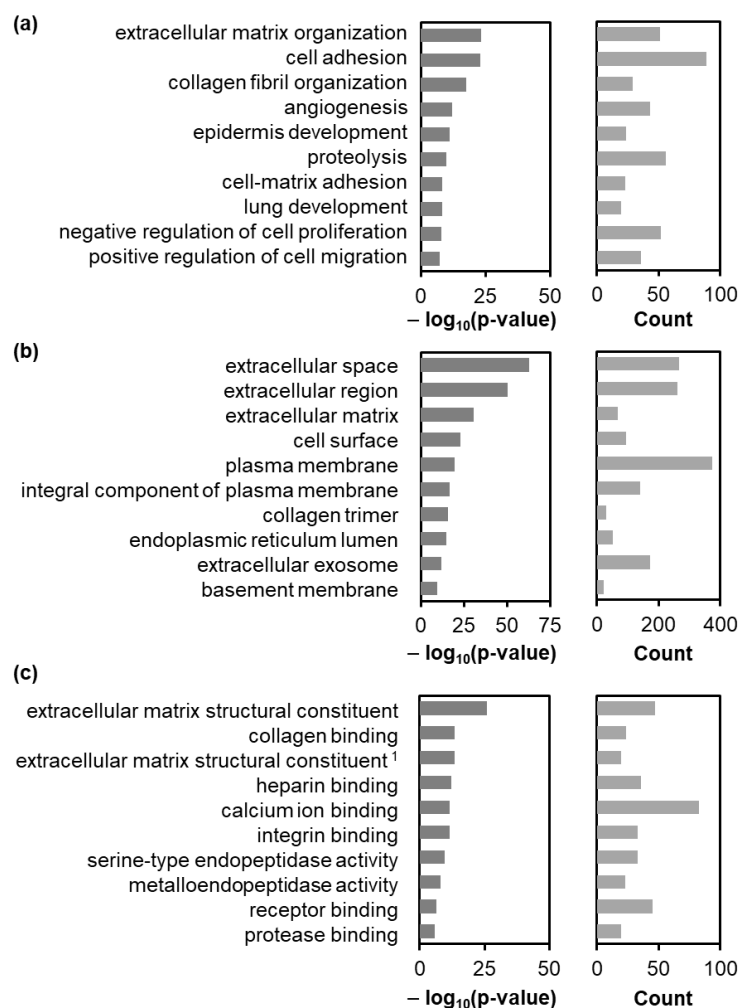

**Figure S2. GO enrichment analysis of differentially expressed genes in the BL2 subtype.**

GO analysis for upregulated DE genes, examining (a) biological processes, (b) cellular processes, and (c) molecular functions. Enriched pathways were visualized with  $-\log_{10}(p\text{-value})$ , along with a count indicating the number of genes within each enrichment.

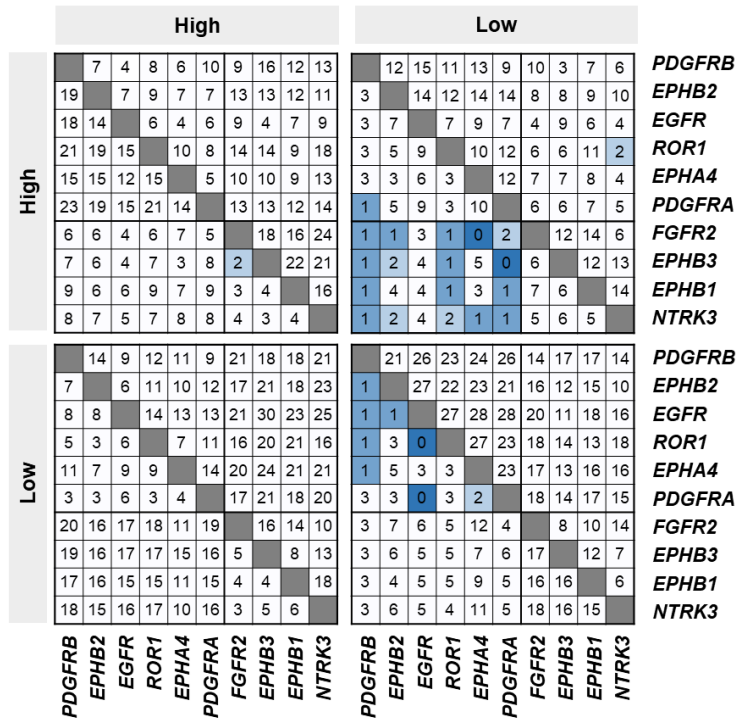

**Figure S3. The relationship between dual expression of identified TK genes and the number of cohorts.**  
The number in each point represents the number of patients.

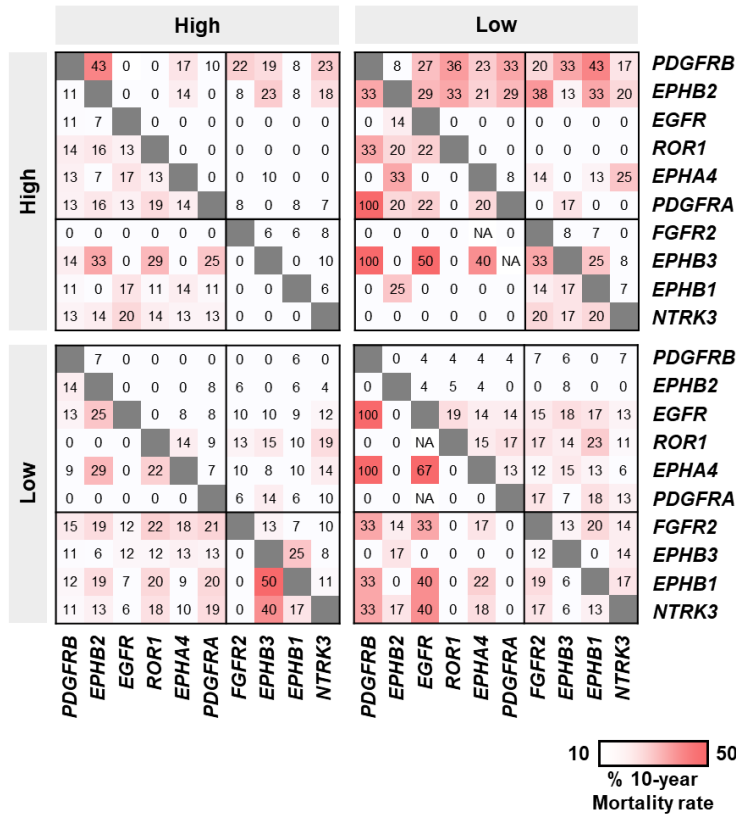

**Figure S4. The relationship between dual expression of identified TK genes and the ten-year mortality rate.** The scale bar represents the ten-year mortality rate, ranging from 10% (white) to 50% (red).

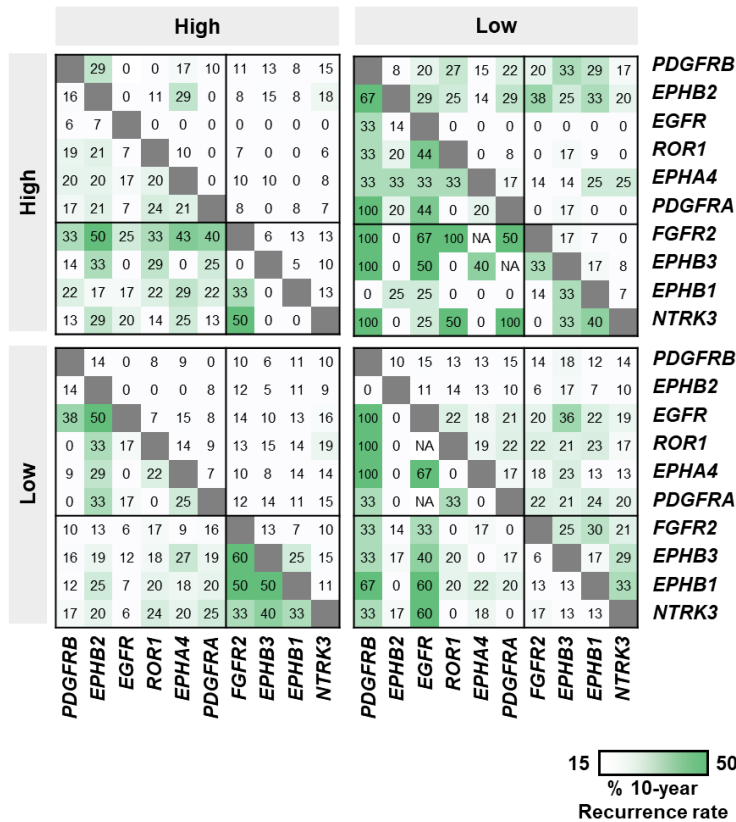

**Figure S5. The relationship between dual expression of identified TK genes and the ten-year recurrence rate.** The scale bar represents the ten-year recurrence rate, ranging from 15% (white) to 50% (green).

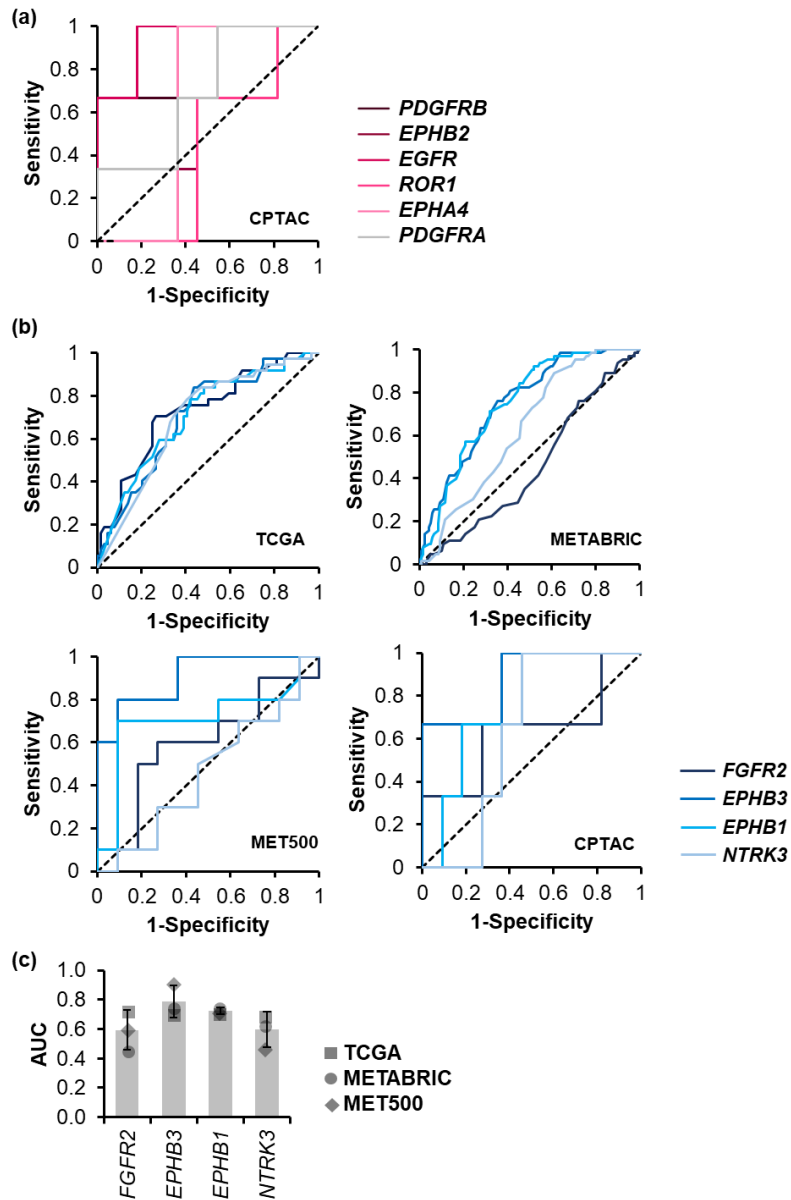

**Figure S6. ROC analysis of identified TK genes across TNBC datasets of the BL1 subtype and CPTAC TNBC dataset of the BL2 subtype.**

(a) For BL2, ROC curves of six upregulated TKs plotted in the CPTAC TNBC dataset. (b) For BL1, ROC curves of six upregulated TKs plotted in a variety of datasets, including TCGA, METABRIC, MET500, and CPTAC. (c) The average AUC across the three datasets. Each symbol indicates the datasets. Data in (c) are mean  $\pm$  standard deviation.

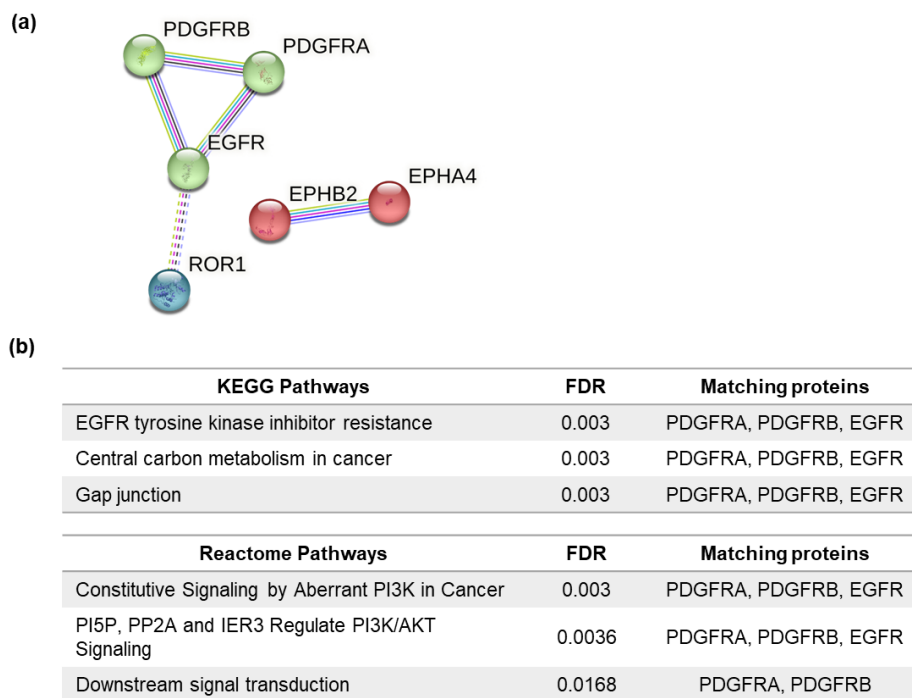

**Figure S7. Protein-protein interaction networks of upregulated tyrosine kinases.**

(a) Analysis using the Search Tool for the Retrieval of Interacting Genes/Proteins (STRING) analysis [66] reveals protein interaction networks among the upregulated tyrosine kinases (TKs): PDGFRB, EPHB2, EGFR, ROR1, EPHA4, and PDGFRA. Employing a high-confidence cut-off (0.700) and k-means clustering (number of clusters = 3), the resulting networks illustrate TKs as nodes interconnected by lines with the solid lines representing validated interactions and the dotted lines representing inter-cluster edges. (b) The functional enrichments are through the KEGG pathways and the Reactome pathways. FDR is a false discovery rate.



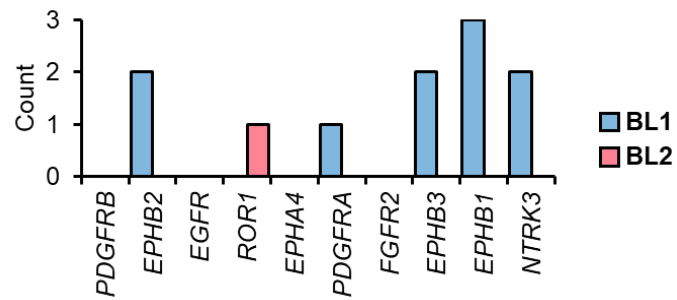

**Figure S8. Mutations of identified tyrosine kinases found in BL1 or BL2 patients.**

The bar graph illustrates the mutation observed in the identified TK genes along with the corresponding patient count.

**Table S1.** The significant association between TK gene expression and the mortality/recurrence rate in BL1 patients.

| Condition 1                                             | Condition 2                                             | <i>p</i> -value |            |
|---------------------------------------------------------|---------------------------------------------------------|-----------------|------------|
|                                                         |                                                         | Mortality       | Recurrence |
| <i>PDGFRB</i> <sup>H</sup> / <i>EPHB2</i> <sup>H</sup>  | <i>PDGFRB</i> <sup>L</sup> / <i>EPHB2</i> <sup>L</sup>  | 0.011           | ns         |
| <i>PDGFRB</i> <sup>H</sup> / <i>EPHB1</i> <sup>L</sup>  | <i>PDGFRB</i> <sup>L</sup> / <i>EPHB1</i> <sup>L</sup>  | 0.017           | ns         |
| <i>EPHB2</i> <sup>H</sup> / <i>PDGFRA</i> <sup>L</sup>  | <i>EPHB2</i> <sup>L</sup> / <i>PDGFRA</i> <sup>L</sup>  | 0.019           | ns         |
| <i>EPHB2</i> <sup>H</sup> / <i>FGFR2</i> <sup>L</sup>   | <i>EPHB2</i> <sup>L</sup> / <i>FGFR2</i> <sup>L</sup>   | 0.028           | ns         |
| <i>PDGFRB</i> <sup>H</sup> / <i>ROR1</i> <sup>L</sup>   | <i>PDGFRB</i> <sup>L</sup> / <i>ROR1</i> <sup>L</sup>   | 0.029           | ns         |
| <i>EPHB3</i> <sup>H</sup> / <i>EPHB1</i> <sup>H</sup>   | <i>EPHB3</i> <sup>H</sup> / <i>EPHB1</i> <sup>L</sup>   | 0.037           | ns         |
| <i>PDGFRB</i> <sup>H</sup> / <i>ROR1</i> <sup>L</sup>   | <i>PDGFRB</i> <sup>L</sup> / <i>ROR1</i> <sup>H</sup>   | 0.037           | ns         |
| <i>EPHB2</i> <sup>H</sup> / <i>EGFR</i> <sup>L</sup>    | <i>EPHB2</i> <sup>L</sup> / <i>EGFR</i> <sup>L</sup>    | 0.039           | ns         |
| <i>EPHB2</i> <sup>H</sup> / <i>EPHB1</i> <sup>L</sup>   | <i>EPHB2</i> <sup>L</sup> / <i>EPHB1</i> <sup>L</sup>   | 0.042           | ns         |
| <i>EPHB2</i> <sup>H</sup> / <i>ROR1</i> <sup>L</sup>    | <i>EPHB2</i> <sup>L</sup> / <i>ROR1</i> <sup>L</sup>    | 0.042           | ns         |
| <i>PDGFRB</i> <sup>H</sup> / <i>PDGFRA</i> <sup>L</sup> | <i>PDGFRB</i> <sup>L</sup> / <i>PDGFRA</i> <sup>L</sup> | 0.044           | ns         |
| <i>EPHB2</i> <sup>H</sup> / <i>EPHB3</i> <sup>H</sup>   | <i>EPHB2</i> <sup>L</sup> / <i>EPHB3</i> <sup>H</sup>   | 0.048           | ns         |
| <i>PDGFRB</i> <sup>H</sup> / <i>NTRK3</i> <sup>H</sup>  | <i>PDGFRB</i> <sup>L</sup> / <i>NTRK3</i> <sup>H</sup>  | 0.048           | ns         |

The superscript “<sup>H</sup>” or “<sup>L</sup>” denotes high or low expression, respectively. “ns” indicates not significant (*p*-value > 0.05) where the *p*-value was calculated using Fisher’s exact test.

**Table S2.** The number of BL1 or BL2 patients with mutations and the average mutation per patient.

| Mutation of             | BL1 (n = 64)              |                                | BL2 (n = 37)              |                                |
|-------------------------|---------------------------|--------------------------------|---------------------------|--------------------------------|
|                         | Patient with mutation (%) | Average mutation (per patient) | Patient with mutation (%) | Average mutation (per patient) |
| All TK genes (90 genes) | 17 (26.6%)                | 2.24 (38 genes)                | 9 (24.3%)                 | 1.11 (10 genes)                |

**Table S3.** Patient characteristics.

| Characteristics                 | BL1     | BL2     |
|---------------------------------|---------|---------|
|                                 | n (%)   | n (%)   |
| <b>Total number of patients</b> | 64      | 37      |
| <b>Age (years)</b>              |         |         |
| < 30                            | 1 (2)   | 0       |
| 31-40                           | 6 (9)   | 2 (5)   |
| 41-50                           | 20 (31) | 10 (27) |
| 51-60                           | 18 (28) | 11 (30) |
| 61-70                           | 11 (17) | 8 (22)  |
| >70                             | 8 (13)  | 6 (16)  |
| <b>Tumor stage</b>              |         |         |
| I                               | 9 (14)  | 6 (16)  |
| II                              | 48 (75) | 20 (54) |
| III                             | 5 (8)   | 9 (24)  |
| IV                              | 0       | 1 (3)   |
| NA                              | 2 (3)   | 1 (3)   |
| <b>Race</b>                     |         |         |
| Black                           | 24 (38) | 8 (22)  |
| White                           | 31 (48) | 27 (73) |
| Others                          | 9 (14)  | 2 (5)   |
| <b>Radiation Therapy</b>        |         |         |
| Received                        | 31 (48) | 21 (57) |
| Not received                    | 25 (39) | 15 (40) |
| NA                              | 8 (13)  | 1 (3)   |

“NA” indicates not available.
